# Supplementary material for: Nutrient cycling characteristics along a chronosequence of forest primary succession in the Hailuogou Glacier retreat area, eastern Tibetan Plateau
Source: PeerJ. 2025 Jan 31;13:e18867. doi: 10.7717/peerj.18867 (PMC11789653; doi:10.7717/peerj.18867)
Supplement: Supplemental Information 1 [file peerj-13-18867-s001.xls]

## Sheet: Biomass
Biomass of fine root	H. rhamnoides					Salix spp.					P. purdomii					A. fabri
Sample sites	1	2	3	Mean	SD	1	2	3	Mean	SD	1	2	3	Mean	SD	1	2	3	Mean	SD
S1	0.009	0.013	0.018	0.0133333	0.00450925	0.04268	0.02756	0.04753	0.0392567	0.0104158	0.00604	0.00822	0.01304	0.0091	0.00358201
S2	0.016391	0.0301478	0.094107	0.0468819	0.0414725	0.071754	0.096147	0.092377	0.0867593	0.013131	0.648666	0.529527	0.418869	0.532354	0.114925
S3	0.0232655	0.0858953	0.0950964	0.0680857	0.0390872	0.0798909	0.0993309	0.123434	0.100885	0.0218129	0.895279	1.28998	1.47972	1.22166	0.298151	0.000194416	0.000283	0.000115934	0.000197783	8.35841e-05
S4	0.02984	0.0784822	0.0540436	0.0541219	0.0243212	0.0641	0.0683109	0.0802118	0.0708742	0.00835618	1.86175	1.72261	1.14905	1.5778	0.377773	0.00228525	0.0005607	0.00111793	0.00132129	0.000880077
S5											0.26786	0.18347	0.4632	0.304843	0.143485	1.85601	1.36955	1.05068	1.42541	0.405562
S6																1.51633	1.57636	1.9327	1.67513	0.225074
*fine root (diameter <2 mm)
Biomass of midium root	H. rhamnoides					Salix spp.					P. purdomii					A. fabri
Sample sites	1	2	3	Mean	SD	1	2	3	Mean	SD	1	2	3	Mean	SD	1	2	3	Mean	SD
S1	0.038	0.027	0.011	0.0253333	0.0135769	0.08613	0.05266	0.06258	0.0671233	0.0171913	0.02074	0.01345	0.01091	0.0150333	0.00510269
S2	1.56598	1.42685	0.472777	1.1552	0.595078	0.155381	0.121339	0.107341	0.12802	0.0247071	0.541014	0.63537	0.687147	0.621177	0.0740931
S3	1.68903	1.68032	0.651044	1.34013	0.596784	0.160125	0.158892	0.139713	0.15291	0.0114455	1.63234	1.24809	1.02875	1.30306	0.305527	0.000292169	0.000228055	0.000170591	0.000230271	6.08193e-05
S4	1.50456	1.18395	0.544567	1.07769	0.488738	0.109275	0.196259	0.162695	0.156076	0.0438679	1.35259	1.53654	2.33643	1.74186	0.523069	0.00342312	0.00255998	0.00217214	0.00271841	0.000640366
S5											0.73351	0.3542	0.54207	0.54326	0.189658	5.88675	2.36926	2.89853	3.71818	1.89659
S6																3.04287	2.93349	2.51836	2.83157	0.276709
*medium root (2-30 mm)
Biomass of coarse root	H. rhamnoides					Salix spp.					P. purdomii					A. fabri
Sample sites	1	2	3	Mean	SD	1	2	3	Mean	SD	1	2	3	Mean	SD	1	2	3	Mean	SD
S1	0.426	0.376	0.124	0.308667	0.161868	0.28856	0.20976	0.26251	0.25361	0.0401468	0.20253	0.17563	0.11338	0.163847	0.0457282
S2	2.63154	2.99086	2.3872	2.66986	0.30365	2.13983	1.815	2.41407	2.12297	0.299891	7.02258	8.80074	8.97614	8.26649	1.08082
S3	2.62198	2.46002	2.55085	2.54428	0.0811785	2.58965	2.25304	1.8744	2.23903	0.357832	22.8055	20.4225	16.7787	20.0022	3.03529	0.000599335	0.00101127	0.00141436	0.00100832	0.000407523
S4	1.76454	1.46657	1.78807	1.67306	0.179213	1.95383	2.19922	1.86295	2.00533	0.173954	22.605	27.6358	33.6022	27.9477	5.5052	0.00699346	0.00963402	0.012162	0.00959649	0.00258448
S5											7.3647	6.84215	7.28711	7.16465	0.281978	32.5601	38.1885	38.6075	36.452	3.37705
S6																31.5821	30.0994	33.3534	31.6783	1.62912
*coarse root (>30 mm)
Biomass of leaf	H. rhamnoides					Salix spp.					P. purdomii					A. fabri
Sample sites	1	2	3	Mean	SD	1	2	3	Mean	SD	1	2	3	Mean	SD	1	2	3	Mean	SD
S1	0.258	0.2141	0.108	0.193367	0.0771194	0.08452	0.08456	0.12665	0.0985767	0.0243122	0.19092	0.19072	0.15066	0.177433	0.0231866
S2	0.310162	0.310062	0.363365	0.327863	0.0307457	0.288252	0.287252	0.521172	0.365559	0.134766	0.652578	0.653578	0.671979	0.659378	0.0109239
S3	0.210924	0.210964	0.269476	0.230455	0.0337939	0.179861	0.179841	0.496407	0.28537	0.182764	1.04488	1.04488	1.08642	1.05873	0.0239842	0.000152918	0.000172912	0.000893455	0.000406428	0.000421896
S4	0.0273764	0.0273364	0.0212873	0.0253333	0.00350405	0.0411555	0.0401555	0.0510145	0.0441085	0.00600169	1.69127	1.68127	1.87788	1.75014	0.11074	0.00140148	0.00140162	0.00460327	0.00246879	0.00184851
S5											0.2105	0.2108	0.16755	0.196283	0.0248842	13.6955	13.6979	13.4568	13.6167	0.138512
S6																15.7978	15.7968	12.266	14.6202	2.03878
Biomass of branch	H. rhamnoides					Salix spp.					P. purdomii					A. fabri.
Sample sites	1	2	3	Mean	SD	1	2	3	Mean	SD	1	2	3	Mean	SD	1	2	3	Mean	SD
S1	1.486	1.127	0.869	1.16067	0.309875	0.4173	0.30475	0.22783	0.316627	0.0952917	0.1128	0.13017	0.14902	0.130663	0.018115
S2	7.83318	7.91822	7.04853	7.59998	0.479455	1.9333	1.89531	2.78576	2.20479	0.503491	7.18951	6.01303	5.04704	6.08319	1.07296
S3	5.58801	5.15867	6.35695	5.70121	0.607106	1.78549	1.85276	2.18887	1.94237	0.216109	17.4609	15.2488	13.9417	15.5505	1.77886	0.00328797	0.00208614	0.00149367	0.00228926	0.000914233
S4	0.704725	0.548121	0.219559	0.490802	0.24761	2.33688	1.34265	0.897213	1.52558	0.737059	19.2198	15.8648	15.002	16.6955	2.22825	0.0344599	0.0208193	0.0178623	0.0243805	0.00885335
S5											3.76598	2.65401	3.76598	3.39532	0.641996	36.5802	27.9027	30.8761	31.7863	4.40981
S6																36.0187	35.0152	34.4757	35.1699	0.783032
Biomass of stem	H. rhamnoides					Salix spp.					P. purdomii					A. fabri.
Sample sites	1	2	3	Mean	SD	1	2	3	Mean	SD	1	2	3	Mean	SD	1	2	3	Mean	SD
S1	0.927	0.956	0.808	0.897	0.0784283	1.24027	1.55941	0.9896	1.26309	0.28559	1.32357	1.12389	1.1058	1.18442	0.120846
S2	22.6055	11.3629	9.79034	14.5862	6.98924	17.8493	14.6055	12.9553	15.1367	2.48985	53.3528	48.6658	47.5132	49.8439	3.09293
S3	16.25	18.6786	3.33876	12.7558	8.24531	13.6331	11.1174	9.77013	11.5069	1.96071	113.206	104.275	97.4776	104.986	7.88828	0.00438425	0.00367391	0.00306382	0.00370733	0.000660852
S4	5.70081	3.30898	1.07956	3.36312	2.3111	8.01943	6.434	8.58387	7.6791	1.11461	141.684	135.064	124.507	133.752	8.6632	0.0257318	0.0334179	0.0475988	0.0355828	0.0110931
S5											33.5517	27.6507	21.8176	27.6733	5.86711	143.76	125.319	117.756	128.945	13.3755
S6																252.186	236.68	220.36	236.409	15.9149
Biomass of bark	H. rhamnoides					Salix spp.					P. purdomii					A. fabri.
Sample sites	1	2	3	Mean	SD	1	2	3	Mean	SD	1	2	3	Mean	SD	1	2	3	Mean	SD
S1	0.156	0.128	0.101	0.128333	0.0275015	0.10275	0.10184	0.09755	0.100713	0.00277705	0.12092	0.08401	0.1346	0.113177	0.0261688
S2	2.68558	1.38667	1.1943	1.75552	0.81118	1.55352	1.28007	1.28404	1.37254	0.156742	3.00175	3.5949	3.63144	3.40936	0.353477
S3	2.53117	0.824348	1.88587	1.74713	0.861826	1.52332	1.41225	1.25861	1.39806	0.132926	7.76271	8.67341	8.45041	8.29551	0.474701	0.000258436	0.000294884	0.000258436	0.000270585	2.10428e-05
S4	0.531819	0.735234	0.632929	0.633327	0.101708	1.12543	1.11786	0.764898	1.00273	0.206003	13.3908	11.5366	11.5457	12.1577	1.0679	0.00226257	0.00207572	0.00278598	0.00237476	0.000368179
S5											4.05726	1.98057	2.6872	2.90834	1.05586	8.56801	11.5277	9.85054	9.98207	1.48421
S6																13.8792	20.3584	17.9092	17.3823	3.27156
Sample sites	Biomass of shrub
	1	2	3	Mean	SD
S1	0.02426	0.02706	0.01826	0.0231933	0.00449592
S2	0.147155	0.266469	0.337071	0.250232	0.0959935
S3	2.00549	1.77001	2.01144	1.92898	0.137707
S4	6.79224	4.56173	4.67987	5.34461	1.25507
S5	12.5257	11.2055	9.35447	11.0286	1.59301
S6	15.2964	23.7384	17.0994	18.7114	4.44589
Sample sites	Biomass of herb
	1	2	3	Mean	SD
S1	0.17564	0.18675	0.16054	0.17431	0.0131555
S2	0.654521	0.535943	0.425507	0.538657	0.114531
S3	0.80797	0.759882	1.02216	0.863337	0.139629
S4	1.9603	1.28234	2.45107	1.8979	0.586857
S5	0.3546	0.7827	0.5816	0.572967	0.214181
S6	2.11394	1.95478	1.21302	1.76058	0.480832
Sample sites	Biomass of moss
	1	2	3	Mean	SD
S1	0.14642	0.93476	0.1678	0.416327	0.449104
S2	0.842845	1.14134	0.778482	0.92089	0.193611
S3	1.9483	1.77497	1.38543	1.7029	0.288274
S4	1.61824	1.5876	3.26472	2.15685	0.959563
S5	12.4572	8.70526	13.2437	11.4687	2.42531
S6	6.37399	6.11851	5.13988	5.87746	0.651412
Sample sites	Biomass of litter
	1	2	3	Mean	SD
S1	0.4603	0.63435	0.56376	0.552803	0.0875408
S2	1.3207	1.83467	1.12677	1.42738	0.365809
S3	1.6368	1.61307	1.82803	1.69263	0.117856
S4	1.6952	1.98432	1.80342	1.82765	0.146075
S5	2.175	2.81207	2.22639	2.40449	0.353912
S6	1.8946	2.59372	2.4546	2.31431	0.370073
	*1,2,3 indicate three duplicates
